1  
2  
3  
4  
5  
6  
7  
8  
9  
10  
11  
12  
13  
14  
15  
16  
17  
18  
19  
20  
21  
22  
23  
24  
25  
26  
27  
28  
29  
30  
31  
32  
33  
34  
35  
36  
37  
38

# Dynamic gain adjustments in descending corticofugal outputs from auditory cortex compensate for cochlear nerve synaptic damage

Meenakshi M Asokan<sup>1\*,2</sup>, Ross S Williamson<sup>1,3</sup>, Kenneth E Hancock<sup>1,3</sup>, and Daniel B Polley<sup>1,2,3</sup>

<sup>1</sup>Eaton-Peabody Laboratories, Massachusetts Eye and Ear Infirmary, Boston MA 02114

<sup>2</sup>Division of Medical Sciences, Harvard University, Boston MA 02114

<sup>3</sup>Department of Otolaryngology, Harvard Medical School, Boston MA 02114

**Keywords:** Top-down, centrifugal, descending, feedback, tinnitus, hyperacusis, layer 5, auditory cortex, GCaMP, homeostatic plasticity, synaptopathy

39

## Abstract

40 Layer 5 (L5) cortical projection neurons innervate far-ranging brain areas to coordinate  
41 integrative sensory processing and adaptive behaviors. Here, we characterize a compensatory  
42 plasticity in L5 auditory cortex (ACTx) projection neurons with axons that innervate the inferior  
43 colliculus (IC), thalamus, lateral amygdala and striatum. We used widefield calcium imaging to  
44 monitor daily changes in sound processing from the dense plexus of corticocollicular (CCol)  
45 axon terminals in awake adult mice. CCol sound level growth functions were stable in control  
46 conditions but showed bi-phasic gain changes following damage to cochlear afferent synapses.  
47 Auditory nerve and CCol growth functions were sharply reduced hours after cochlear  
48 synaptopathy, but CCol response gain rebounded above baseline levels by the following day  
49 and remained elevated for 2 weeks despite a persistent reduction in auditory nerve input.  
50 Sustained potentiation of excitatory ACTx projection neurons that innervate multiple limbic and  
51 subcortical auditory centers may underlie hyperexcitability and aberrant functional coupling of  
52 distributed brain networks in tinnitus.

53

54 The auditory system employs a variety of gain control mechanisms to encode  
55 fluctuations in acoustic signal energies that can vary by over a million-million fold (120 dB).  
56 Auditory gain control places a premium on speed, often activating within tens or hundreds of  
57 milliseconds following sudden changes in sound level to protect the ear from over-exposure  
58 and adjust the dynamic range of neural coding<sup>1,2</sup>. In addition to these “fast acting” gain control  
59 systems, central auditory neurons also exhibit slower gain control systems over time scales

60 ranging from days to months that increase neural excitability following peripheral afferent  
61 damage<sup>3</sup>.

62 Descending auditory centrifugal projections may play an important role in adaptive gain  
63 control. For example, brainstem efferent neurons change the acoustic impedance of the middle  
64 ear and dampen excitability of cochlear sound transduction to protect the inner ear and  
65 normalize activity levels in the auditory nerve<sup>4</sup>. The largest descending auditory pathway arises  
66 from neurons in the deep layers of the auditory cortex (ACtx) that innervate nearly all levels of  
67 subcortical auditory processing as well as many structures outside of the classical auditory  
68 pathway such as the lateral amygdala and striatum<sup>5,6</sup>. Less is known about how corticofugal  
69 neurons support various forms of central gain control<sup>7,8</sup>. Although non-selective lesions,  
70 inactivation or stimulation of ACtx neurons can have striking effects on subcortical auditory  
71 responses, the effects are often heterogeneous, with neurons in the same brain region showing  
72 diverse forms of modulation<sup>9-14</sup>.

73 Corticofugal neurons themselves are not a singular cell type, but rather comprise a  
74 diverse set of projection neurons with distinct local inputs, subcortical targets, intrinsic  
75 properties and synaptic properties<sup>15-20</sup>. Traditional approaches to characterize the effects of  
76 cortical feedback on subcortical sound processing and plasticity through cooling,  
77 pharmacological silencing or microstimulation indiscriminately manipulate multiple types of  
78 corticofugal neurons as well as interneurons, intracortical projection neurons or even axons of  
79 passage. This technical limitation may explain why the subcortical effects of ACtx manipulations  
80 are often heterogeneous and has generally hampered progress in understanding how  
81 corticofugal neurons contribute to auditory processing and gain control. Recent efforts have

82 begun to circumvent these limitations by using approaches to lesion<sup>21,22</sup>, rewire<sup>23</sup>, or  
83 optogenetically activate and silence select classes of auditory projection neurons<sup>24-27</sup>. While  
84 paradigms to artificially manipulate the activity of corticofugal pathways have their appeal,  
85 there is also a need to monitor the activity of select classes of corticofugal neurons and  
86 describe how naturally occurring plasticity in their auditory response profiles support central  
87 gain adjustments across a variety of time scales. To this end, we adapted a widefield calcium  
88 imaging approach to track daily changes in sound processing from the axons of ACtx neurons  
89 that project to the inferior colliculus (IC)<sup>28,29</sup>. We describe rapid adjustments in corticocollicular  
90 (CCol) response gain that offset a loss of peripheral input following noise-induced cochlear  
91 synaptic damage.

92

93

## Results

94 *Axons of ACtx corticocollicular projection neurons can have other downstream targets*

95 *throughout the forebrain*

96 Layer (L) 5 pyramidal cells are the canonical “broadcast” neurons of the cortex, with far-  
97 ranging projections throughout the neocortex, striatum, amygdala, thalamus, midbrain, and  
98 brainstem<sup>30,19</sup>. Dual retrograde tracer studies have emphasized that ACtx L5 projections to  
99 downstream targets are anatomically separate, such that L5 neurons that project to the inferior  
100 colliculus (CCol) are largely separate from those that project to the lateral amygdala,  
101 contralateral cortex and so forth<sup>31</sup> (though prior work has identified a small fraction of double-  
102 labeled cells that project both to the IC and striatum<sup>32</sup> or both to the IC and brainstem<sup>33</sup>).  
103 Interpreting the findings of dual retrograde tracer studies is challenging, as there is a risk of

104 underestimating the true prevalence of projection neurons that innervate multiple downstream  
105 targets. Because tracer injections fill only a fraction of the target nucleus, the entirety of an  
106 axon projection zone (or portions thereof) could be missed by one of the tracers, leading to  
107 false negatives. Secondly, dual tracer studies can only identify divergence to a maximum of two  
108 downstream structures leaving unanswered the possibility that cortical neurons could broadly  
109 innervate multiple targets<sup>20</sup>.

110 While ground truth estimates of projection diversity will ultimately require whole brain  
111 reconstructions of individual cells, we used an intersectional virus strategy to determine  
112 whether the axons of at least some CCol projection neurons also innervate other structures.  
113 This was accomplished by first injecting a canine adeno virus (CAV2), which offers a strong bias  
114 for retrograde infection into the IC (n = 2 mice)<sup>34-36</sup>. With cre-recombinase expressed in  
115 neurons that project to the IC, we then injected a cre-dependent virus into the ipsilateral ACtx  
116 to express a fluorescent marker throughout CCol neuron axon fields. We observed labeled L5  
117 cell bodies and strong terminal labeling in the external and dorsal cortex of the IC, as expected  
118 (**Fig. 1A**). Interestingly, we also observed terminal labeling of CCol axon collaterals in the dorsal  
119 subdivision of the medial geniculate body (MGB) (Fig. 1A, middle row), caudal regions of the  
120 dorsal striatum and the lateral amygdala (Fig. 1A, bottom row). Although well known that L5  
121 neurons of ACtx project to each of these targets, the intersectional viral labeling strategy used  
122 here suggested that at least some CCol neurons have far-ranging projections to other structures  
123 throughout the ipsilateral forebrain. By contrast, CCol axon labeling was sparse in the  
124 contralateral cortex, ipsilateral olivary complex and ipsilateral cochlear nucleus (data not  
125 shown). With the caveat that an absence of labeling (e.g., double-labeled cell bodies or CCol

126 terminals) should be interpreted cautiously, these observations suggest L5 CCol projection  
127 neurons may have multiple projections within the ipsilateral forebrain but are largely distinct  
128 from the L5 neurons that project to the contralateral hemisphere and brainstem<sup>17,33,37</sup>.

129

130

### 131 Visualizing sound-evoked activity from CCol neurons

132 Having established that at least some CCol neurons comprise a broader, widespread  
133 corticofugal projection that also innervates the auditory thalamus, dorsal striatum and lateral  
134 amygdala, we next developed an approach to monitor daily changes in their activity levels (**Fig.**  
135 **1B**). We reasoned that this could be accomplished with calcium imaging, though 2-photon  
136 imaging of L5 CCol cell bodies is challenging on account of their depth from the surface and  
137 prominent apical dendrites. Instead, we adapted a protocol to express the genetically encoded  
138 calcium indicator GCaMP6s in the ACTx and then image sound-evoked responses from CCol  
139 axons on the dorsal surface of the brain, atop the IC (**Fig. 1C**)<sup>28,29</sup>. By implanting custom head-  
140 restraint hardware and a cranial window<sup>38</sup> over the dorsal cap of the IC, we were able to  
141 perform daily widefield epifluorescence imaging of CCol axon population activity in awake mice  
142 (**Fig. 2A**). We observed that CCol axon response amplitude increased monotonically with sound  
143 level, as estimated from the peak fractional change in GCaMP6s amplitude evoked by a brief  
144 (50 ms) broadband noise burst (**Fig. 2B-C**). By contrast, sound level growth functions were fairly  
145 flat when signals were measured from more caudal locations within the imaging window (**Fig.**  
146 **2C**, blue line), demonstrating that responses could not be attributed to non-specific changes in

147 time-locked intrinsic signals or autofluorescence measured from brain areas without GCaMP6s  
148 expression.

149 To assess the stability of CCol response growth functions over time, we repeated the  
150 imaging experiment for seven consecutive days in each mouse (n=5). Qualitatively, we  
151 observed a fairly consistent monotonic growth in CCol response amplitude, as shown in a  
152 representative example mouse (**Fig. 2D**, top row). Gain describes a change in output per unit  
153 change in input (e.g., CCol response amplitude per unit increase in dB SPL). We quantified  
154 changes in CCol response gain across the linear portion of the sound level growth function (40-  
155 80 dB SPL), as the transformation between the mean CCol response growth measured during  
156 the first two imaging sessions ( $r_{baseline}$ ) to the CCol response growth measured on any given  
157 day ( $r_{day}$ ) according to the formula  $r_{day} = m \times r_{baseline} + c$ . With this approach, the slope of  
158 the linear fit ( $m$ ) describes the multiplicative ( $m > 1$ ) or divisive ( $m < 1$ ) change in response  
159 growth on any given imaging session with respect to the baseline period (**Fig. 2D**, bottom row).  
160 In the absence of any explicit perturbation, we observed that CCol gain changes over a 7-day  
161 imaging period were minimal (Two-way repeated measures ANOVA, main effect for imaging  
162 session,  $F = 1.15$ ,  $p = 0.36$ ; sound level x session interaction term,  $F=1.34$ ,  $p = 0.12$ ,  $n=5$ , **Fig. 2E**).

163

#### 164 Moderate intensity noise exposure damages cochlear afferent synapses

165 Having established that CCol response gain is relatively stable from one day to the next  
166 in a control condition, we next addressed whether and how corticofugal outputs from the ACtx  
167 increase response gain to compensate for a loss in peripheral input. Isolating dynamics in  
168 central gain is challenging with protocols that induce widespread cochlear damage, because the

169 loss of outer hair cell-based amplification introduces complex changes in cochlear tuning that  
170 are inextricable from changes arising through central plasticity. For this reason, central gain  
171 dynamics in intact preparations are most readily studied with hearing loss protocols that  
172 selectively eliminate cochlear afferent neurons in the spiral ganglion or their peripheral  
173 synapses onto inner hair cells without inducing permanent changes to cochlear transduction  
174 and amplification mechanisms.

175 We implemented a protocol to track changes in the auditory brainstem response (ABR)  
176 and a non-invasive measure of outer hair cell function, the distortion product otoacoustic  
177 emission (DPOAE), following noise exposure that was calibrated to damage cochlear afferent  
178 synapses at the high-frequency base of the cochlea without causing permanent damage to  
179 cochlear hair cells<sup>39</sup>. Following baseline measurements, mice were exposed to a continuous  
180 band of octave-wide noise (8-16 kHz at 100 dB SPL) for 2 hours (**Fig. 3A**). As described in many  
181 previous studies<sup>40</sup>, this moderate intensity noise induced a temporary shift in DPOAE and ABR  
182 thresholds measured 24 hours after noise exposure before returning to baseline levels when  
183 tested again, several weeks later (Repeated measures ANOVA,  $F > 30$ ,  $p < 0.00001$  for both  
184 DPOAE and ABR threshold shift at 24 hours versus 2 weeks, **Fig. 3B and Fig. 3C**, respectively).

185 Wave 1 of the ABR is generated by Type-I spiral ganglion neurons, where the amplitude  
186 is proportional to the number of their intact synapses onto inner hair cells<sup>39-41</sup>. Prior work has  
187 demonstrated that a reduced amplitude of ABR wave 1 can reflect a “hidden” degeneration of  
188 primary cochlear afferents that is not detected by standard measurements of DPOAE and ABR  
189 threshold shift<sup>40</sup>. We confirmed this observation in our data; 24 hours following noise exposure,  
190 ABR wave 1 amplitude was reduced at test frequencies ranging from 11.3 – 32 kHz (Repeated



191 Measures ANOVA, Baseline vs. Day 1,  $F > 12$ ,  $p < 0.005$  for 11.3-32 kHz tones; **Fig. 3D** gray vs  
192 orange). When measured again 2 weeks after noise exposure, a full recovery was observed at  
193 low- and mid-frequencies, yet wave 1 amplitude remained significantly reduced at 22.6 and 32  
194 kHz (Repeated Measures ANOVA, Baseline vs. 2 weeks,  $F < 2.1$ ,  $p > 0.05$  for 8-16 kHz;  $F > 9$ ,  $p <$   
195  $0.005$  for 22.6 and 32 kHz, **Fig. 3D**, gray vs red). To confirm that reduced ABR wave 1 amplitude  
196 was associated with a loss of cochlear afferent synapses, we quantified immunolabeling of  
197 auditory nerve synapses onto inner hair cells in the high-frequency base of the cochlea (**Fig. 3E-**  
198 **F**). We found that approximately 50% of cochlear afferent synapses were eliminated when  
199 measured 24 hours after noise exposure or 2 weeks following noise exposure, as reported  
200 previously (Synaptic counts were made from  $20.77 \pm 0.02$  to  $21.73 \pm 0.63$  inner hair cells per  
201 ear in all groups, 3 ears per group, unpaired t-tests,  $p < 1 \times 10^{-8}$  for both control vs 24 hours and  
202 control vs 2 weeks after correcting for multiple comparisons; **Fig. 3G**)<sup>42</sup>.

203

204 *A rapid and sustained increase in corticofugal gain offsets reduced auditory nerve input*  
205 *following cochlear synaptic damage*

206 To contrast changes in sound level growth functions measured in the auditory nerve and  
207 CCol axons following cochlear synaptopathy (**Fig. 4A**), we tracked the day-to-day changes in  
208 wave 1 amplitude and CCol response amplitude evoked by a broadband noise burst before and  
209 after moderate noise exposure (**Fig. 4B**). As predicted from cochlear function testing with tone  
210 bursts, wave 1 growth functions were depressed following noise exposure and did not recover  
211 to baseline levels (**Fig. 4C**). Although CCol gain was pegged to wave 1 in the first hours following  
212 noise exposure, we observed that the gain was increased above baseline levels by D2 (2-way

213 repeated measures ANOVA, main effect for imaging session,  $F > 9$ ,  $p < 1 \times 10^{-8}$ ; imaging session  
214  $\times$  sound level interaction term,  $F > 7$ ,  $p < 0.05$ ,  $n=10$ , **Fig. 4D**).

215 A side-by-side comparison of daily changes in noise-evoked CCol response gain, ABR  
216 wave 1 amplitude, and wave 1 threshold highlights the distinct regulation of each signal. The  
217 moderate intensity noise exposure protocol reversibly elevates ABR thresholds for 1-2 days,  
218 based on transient changes in cochlear biomechanics (**Fig. 5A**). ABR responses at threshold  
219 reflect outer hair cell integrity and activation of low-threshold auditory nerve fibers. The  
220 moderate intensity noise exposure protocol used here primarily eliminates synapses from  
221 higher-threshold auditory nerve fibers onto inner hair cells<sup>39</sup>. Therefore, a substantial loss of  
222 auditory nerve afferent fibers can “hide” behind normal ABR thresholds, but can be reliably  
223 revealed by measuring the growth of ABR wave 1 amplitude across a range of suprathreshold  
224 sound levels<sup>39,42</sup>. We observed a pronounced loss in ABR wave 1 amplitude hours after noise  
225 exposure that reflected the combined loss of auditory nerve synapses and additional transient  
226 biomechanical changes that underlie the temporary threshold shift<sup>40</sup>. Suprathreshold response  
227 gain in the auditory nerve partially recovered on D1-D2, as the sources of temporary threshold  
228 shift reversed, leaving ~60% reduction in the auditory nerve growth slope through D7 that  
229 presumably arose from the loss of approximately 50% loss of high-frequency cochlear afferent  
230 synapses (**Fig. 5B**, blue line).

231 Whereas CCol response gain remains stable under control conditions (**Fig. 5B**, gray line),  
232 we observed a rapid, bi-phasic change following cochlear synaptopathy, such that CCol  
233 response gain was depressed hours following noise exposure but then rose above baseline  
234 levels one day later, despite the substantial loss of auditory nerve input (**Fig. 5B**, red line, D2-7).

235 CCol response gain remained elevated for at least 14 days following cochlear synaptopathy,  
236 based on a subset of mice that underwent an extra week of daily imaging (**Fig. 5C**,  $n = 5$ ). By  
237 compiling the estimates of response gain measured in each mouse from each individual imaging  
238 session, we confirmed that CCol response gain was reduced by 83.3% hours after noise  
239 exposure (ANOVA main effect for group, pairwise comparison for control vs D1,  $p = 0.00001$   
240 after correcting for multiple comparisons, **Fig. 5D**). CCol response gain was significantly  
241 elevated above control levels at D2-4, D7-9 and D12-14 time points (78.2%, 38.8% and 60.5%,  
242 respectively,  $p < 0.05$  for each pairwise comparison after correcting for multiple comparisons).  
243 We found that the CCol gain elevation remained stable over time, as no significant differences  
244 were noted in D2-4 to D12-14 or D7-9 to D12-14 contrasts (-9.9% and +15.6%, respectively,  
245 pairwise comparisons,  $p > 0.39$  for each after correcting for multiple comparisons).

246

## 247 **Discussion**

248 Central auditory neurons compensate for a sudden loss of input from the ear by  
249 increasing intrinsic excitability<sup>43,44</sup> and modifying both the sub-unit composition and functional  
250 response properties of excitatory and inhibitory synapses<sup>45-52</sup>. Collectively, these changes  
251 function as a central amplifier that increases the neural gain on diminished afferent inputs from  
252 the auditory periphery. At the level of single units or population responses in intact  
253 preparations, increased central gain can manifest as elevated spontaneous firing rates,  
254 increased spike synchronization, disinhibition, and steeper rising slopes in sound level growth  
255 functions<sup>3,53</sup>. At the level of auditory perception, increased central gain may provide the means  
256 to maintain relatively normal perceptual thresholds and basic sound awareness even following

257 an extreme (> 90%) loss of peripheral afferents that renders the ABR grossly abnormal or  
258 absent altogether<sup>41,54–56</sup>.

259 Increased central gain in the auditory system is sometimes described as a form of  
260 homeostatic plasticity, though it remains to be seen how well this label fits. Homeostatic  
261 plasticity is a negative feedback process that stabilizes neural activity levels following input  
262 perturbations. Homeostatic mechanisms modify excitatory and inhibitory synapses over a  
263 period of hours or days to offset input perturbations and gradually restore spiking activity back  
264 to baseline levels<sup>57</sup>. Central changes in auditory gain also offset a loss of input, but have an  
265 uncertain connection to homeostatic plasticity because studies have largely been based on  
266 acute measurements from unspecified cell types in separate deprived and control groups  
267 without *ex vivo* analysis of the underlying synaptic changes (but see<sup>48,49,58</sup>). Recent work in the  
268 sensory-deprived somatosensory and visual cortex have identified shifting contributions from  
269 Hebbian and homeostatic plasticity mechanisms that drive increased excitability over the time  
270 course of deprivation<sup>59</sup>, even between neighboring cell types<sup>60</sup>, most notably in this context  
271 between the different types of L5 cortical projection neurons<sup>61</sup>. Understanding the mechanisms  
272 underlying increased central gain would benefit from the application of chronic 2-photon  
273 imaging from identified cell types followed by *ex vivo* recordings to determine whether  
274 underlying synaptic changes reflect homeostatic signaling pathways, Hebbian plasticity  
275 pathways, or something else entirely<sup>62</sup>.

276 By monitoring day-to-day changes in the activity of an anatomically defined cortical  
277 output neuron before and after sensory deprivation, the data described here provide new  
278 insights into the dynamics of compensatory plasticity (despite revealing little about underlying

279 mechanisms). The time course of the compensatory changes described here are in line with a  
280 homeostatic process, yet CCol growth functions rebounded above baseline levels and remained  
281 elevated through the duration of the experiment and therefore the changes described here  
282 were not strictly consistent with a homeostatic plasticity process. Although it is possible that  
283 CCol gain enhancement would eventually return to baseline, we recently reported that  
284 intracortical inhibition from parvalbumin-expressing (PV) GABAergic interneurons remains  
285 significantly depressed relative to pre-exposure baseline levels for as long as 45 days following  
286 cochlear synaptopathy<sup>58</sup>, suggesting that the increased response growth functions observed in  
287 L5 neurons could remain elevated even at longer recovery times. We found that PV-mediated  
288 intracortical inhibition was reduced by as much as 50% over the same 14-day period studied  
289 here, during which time we observed a Hebbian-like enhancement of responses to low-  
290 frequency tones that stimulate undamaged regions of the cochlea. Interestingly, recordings  
291 from these unidentified ACtx regular spiking units found that the gain in sound level growth  
292 functions were only elevated during the first two days after noise exposure, far shorter than the  
293 2 weeks of increased gain observed here in CCol neurons. In the visual cortex, destruction of  
294 vestibular inputs leads to a sustained potentiation of L5 outputs to subcortical oculomotor  
295 nuclei to enable adaptive behavioral modifications in the optokinetic reflex<sup>36</sup>. In the  
296 somatosensory cortex, removal of the preferred whisker input also induces disinhibition<sup>59</sup> and  
297 potentiation of non-deprived whisker inputs in intrinsic bursting L5 neurons, but not  
298 neighboring L5 regular spiking neurons<sup>61</sup>. In ACtx, L5 neurons that project to the IC are intrinsic  
299 bursting, whereas neighboring L5 neurons that, for example, project to the contralateral  
300 hemisphere are regular spiking<sup>15,17,63</sup>. If the effects of sensory deprivation on L5 neurons in the

301 ACtx parallel descriptions in other sensory cortices, the Hebbian component of plasticity in L5  
302 CCol neurons may be expressed to a higher degree than neighboring cell types, producing a  
303 sustained potentiation of responses following sensory deprivation, particularly when PV-  
304 mediated intracortical inhibition is reduced.

305         Enhanced central gain is a hallmark of central auditory changes following noise-induced  
306 hearing loss, and has been linked to hyper-synchronization, dysrhythmia and associated  
307 perceptual disorders including hyperacusis and tinnitus<sup>53,64</sup>. Tinnitus is more than just a  
308 perceptual disorder, as subjects often report increased anxiety, stress, and other complex and  
309 heterogeneous forms of mood dysregulation<sup>65,66</sup>. Aberrant activity in human subjects with  
310 tinnitus or animal models of tinnitus is observed far beyond the central auditory pathway and  
311 has been specifically linked to abnormally strong coupling of an extended network of brain  
312 areas including the ACtx, inferior colliculus, striatum and amygdala<sup>67,68</sup>. As these are the very  
313 same brain areas innervated by the L5 projection neurons studied here, one clear implication is  
314 that the increased sensory gain in these far-ranging ACtx corticofugal output neurons could be a  
315 key contributor to driving hyperexcitability and strong functional coupling in a distributed brain  
316 network underlying tinnitus.

317

318

## Methods

319 All procedures were approved by the Massachusetts Eye and Ear Infirmary Animal Care and Use  
320 Committee and followed the guidelines established by the National Institute of Health for the  
321 care and use of laboratory animals.

322

323 Virus injections

324           Adult CBA/CaJ (6-8 weeks) of either sex were anesthetized using isoflurane in oxygen  
325 (5% induction; 1.5-2% maintenance), with core body temperature maintained at 36.5°. Virus  
326 solution was backfilled into a pulled glass capillary pipette and injected into the target brain  
327 area at 15 nl/min using an automated injection system (Stoelting). For CCol axon imaging, we  
328 opened two small burr holes in the skull (0.5-1mm diameter each) along the caudal-rostral  
329 extent of the squamosal suture that overlies the ACtx. After inserting the pipette 0.5mm into  
330 the cortex, we then injected 250 nl of undiluted AAV5.Syn.GCaMP6s.WPRE.SV40 (UPENN  
331 Vector Core). The virus incubated for approximately 3-4 weeks before imaging began. For axon  
332 tracing experiments, we injected 500 nl of undiluted CAV2-Cre 0.5 mm deep at three equally  
333 spaced sites along the medial-lateral extent of the IC (Universitat Autònoma de Barcelona  
334 Vector Core) in two C57BL6/J mice (aged 6-8 weeks). The following day, we injected a cre-  
335 dependent GCaMP virus into the ACtx using the same injection protocol listed above  
336 (AAV1.Flex.GCaMP6s) and allowed the virus to incubate for 4-6 weeks before sectioning the  
337 brain. Following injections, a dab of antibiotic ointment was applied to each burr hole and the  
338 craniotomies were sealed with a UV-curing cement (Flow-It ALC Flowable Composite). The  
339 wound was closed and mice were injected with an analgesic (Buprenex, 0.05 mg/kg and  
340 Meloxicam, 0.1 mg/kg) before recovering in a warmed chamber.

341

342 Chronic imaging preparation

343           *Cranial windows:* Glass cover slips were first etched in piranha solution (H<sub>2</sub>O<sub>2</sub> mixed with  
344 H<sub>2</sub>SO<sub>4</sub> in a 3:1 ratio) and stored in 70% ethanol. A 4mm diameter cover slip was centered and

345 affixed to a 3mm cover slip (#1 thickness, Warner Instruments) using a transparent, UV-cured  
346 adhesive (Norland Products). Windows were stored in double deionized water and rinsed with  
347 sterile saline before use.

348 *Cranial window implantation surgery:* Animals were anesthetized with isoflurane in  
349 oxygen (5% induction; 1.5-2% maintenance). Dexamethasone sodium phosphate was  
350 administered to reduce brain edema (2 mg/kg, intramuscular). After removing the periosteum  
351 from the dorsal surface of the skull, an etchant (C&B Metabond) was applied for 30 sec to  
352 create a better adhesive surface. A custom titanium headplate (iMaterialise) was bonded to the  
353 dorsal surface of the skull with dental cement (C&B Metabond). In accordance with a published  
354 protocol on chronic cranial window surgical procedure<sup>38</sup>, we made a 3mm circular craniotomy  
355 atop the IC with a pneumatic dental drill and diamond burr (head diameter 1/10 mm,  
356 NeoDiamond – Microcopy Dental). Once liberated, the bone flap was removed with great care  
357 and continuously irrigated with saline to avoid rupturing the pial vessels underneath. The  
358 cranial window was then lowered into place using a 3-D manipulator and bonded to the  
359 surrounding regions of the skull to create a hermetic seal. Post-operative injections of Buprenex  
360 (0.05 mg/kg) and Meloxicam (0.1 mg/kg) were administered and the mice were allowed to  
361 recover in a warmed chamber. Imaging began 5-7 days following recovery from surgery.

362

### 363 Widefield calcium imaging

364 Calcium imaging was performed in awake, head-fixed mice inside of a light- and sound-  
365 attenuating chamber mounted to an isolated optical table (Thorlabs). Blue light illumination  
366 was supplied in epifluorescence configuration from a broadband arc lamp (Lumen Dynamics)



367 passed through a filter cube housing an excitation filter ( $482 \pm 9$  nm), dichroic mirror (reflection  
368 band: 350 – 488 nm; transmission band: 502 – 950 nm] and emission filter ( $520 \pm 14$  nm,  
369 Thorlabs) and focused on the surface of the IC with a 4x / 0.13 NA objective (Nikon). Images  
370 (1392 x 1040 pixels) were acquired with a 1.4 Megapixel CCD camera and transferred to a PC  
371 via a Gigabit Ethernet interface to a framegrabber PCI card (Thorlabs). Image acquisition was  
372 hardware-triggered at 10 frames/s using a TTL pulse train synced to stimulus generation.

373

#### 374 Stimulus presentation

375 Stimuli were generated with a 24-bit digital-to-analog converter (National Instruments  
376 model PXI 4461) and presented via a free-field tweeter (Vifa) positioned 10 cm from the left  
377 (contralateral) ear canal. Stimuli were calibrated before recording with a wideband ultrasonic  
378 acoustic sensor (Knowles Acoustics, model SPM0204UD5). Broadband noise bursts (50 ms  
379 duration, 4 ms raised cosine onset/offset ramps) were pseudorandomly presented between 20-  
380 80 dB SPL in 10 dB increments (50 repetitions per stimulus). Trial duration was 2 s.

381

#### 382 Imaging data analysis

383 Images were first downsampled by a factor of 4 using bicubic interpolation. A region of  
384 interest (ROI) was positioned over an IC region with maximum CCol fluorescence that did not  
385 include surface blood vessels. Exact ROI dimensions varied between mice depending on blood  
386 vessel patterns and craniotomy location ( $100 \times 100 \pm 50$  pixels) but was fixed in size and  
387 position across imaging sessions for a given animal. Population GCaMP responses were  
388 computed from the mean of all pixels within the ROI.

389           After averaging across trials, we computed the pre-stimulus fluorescence level ( $F_0$ ) as  
390 the mean fluorescence across a 0.5 s period immediately prior to stimulus onset. We then  
391 expressed the fractional change in fluorescence  $((F - F_0)/F_0)$  for each frame ( $F$ ). For each sound  
392 level, response amplitude was defined as the peak of the fractional change response, expressed  
393 as a percent change from baseline. A linear model was used to regress the response amplitudes  
394 on each day to the mean response amplitude from the first two baseline imaging sessions. The  
395 regression was limited to the region of linear growth (40-80 dB SPL) to improve the goodness of  
396 fit ( $R^2$ ) across all conditions. The slope of this least-squares fit ( $m$ ) was used to quantify the  
397 degree of divisive ( $m < 1$ ) or multiplicative ( $m > 1$ ) gain changes across imaging days.

398

#### 399 Acoustic over-exposure

400           Mice were exposed to an octave band of noise (8-16 kHz) presented at 100 dB SPL for 2  
401 hrs. During exposures, animals were awake and unrestrained within a 12 x 16 x 16 cm,  
402 acoustically transparent cage. The cage was suspended directly below the horn of the sound-  
403 delivery loudspeaker in a reverberant chamber. Noise calibration to target SPL was performed  
404 immediately before each exposure session.

405

#### 406 Cochlear function tests

407           Mice were anesthetized with ketamine and xylazine (100/10 mg/kg for  
408 ketamine/xylazine, respectively, with boosters of 50 mg/kg ketamine given as needed). Core  
409 body temperature was maintained at 36.5° with a homeothermic blanket system. Acoustic  
410 stimuli were presented via in-ear acoustic assemblies consisting of two miniature dynamic

411 earphones (CUI CDMG15008–03A) and an electret condenser microphone (Knowles FG-23339-  
412 PO7) coupled to a probe tube. Stimuli were calibrated in the ear canal in each mouse before  
413 recording.

414 ABR stimuli were tone bursts (8, 11.3, 16, 22.6 and 32 kHz) or white noise bursts (0-50  
415 kHz), 5 ms duration with a 0.5 ms rise-fall time delivered at 27 Hz, and alternated in polarity to  
416 the left ear. Intensity was incremented in 5 dB steps, from 20-80 dB SPL. ABRs were measured  
417 with subdermal needle electrodes positioned beneath both pinna (+ and -) and the base of the  
418 tail (ground). Responses were amplified (gain = 10,000), filtered (0.3–3 kHz), and averaged  
419 (1024 repeats per level). ABR threshold was defined as the lowest stimulus level at which a  
420 repeatable wave 1 could be identified.

421 DPOAEs were measured in the ear canal using primary tones with a frequency ratio of  
422 1.2, with the level of the  $f_2$  primary set to be 10 dB less than  $f_1$  level, incremented together in 5  
423 dB steps. The  $2f_1-f_2$  DPOAE amplitude and surrounding noise floor were extracted. DPOAE  
424 threshold was defined as the lowest of at least two consecutive  $f_2$  levels for which the DPOAE  
425 amplitude was at least 2 standard deviations greater than the noise floor. All treated animals  
426 underwent rounds of DPOAE and ABR testing with tones before, 2 days and approximately 14  
427 days after noise exposure. ABR to white noise bursts were measured every other day beginning  
428 either 2 days before noise exposure ( $n = 3$ ) or the day before noise exposure ( $n=3$ ), for a total of  
429 4-5 ABR test sessions for a given mouse.

430

431 Visualization of corticofugal axons

432 Deeply anesthetized mice were perfused transcardially with 0.01M phosphate buffered  
433 saline (pH = 7.4) followed by 4% paraformaldehyde in 0.01M PBS. Brains were removed and  
434 stored in 4% paraformaldehyde for 12 hrs before transferring to cryoprotectant (30% sucrose in  
435 0.01M PBS) for at least 48 hrs. Sections (40  $\mu$ m thick) were cut using a cryostat (Leica), mounted  
436 on glass slides and coverslipped using Vectashield Mounting Medium with DAPI (Vector Labs).  
437 ACtx cell bodies and distribution of CCol axons were visualized and photographed using an  
438 epifluorescence microscope (Leica).

439

#### 440 Cochlear histology and synapse quantification

441 Cochleae were dissected and perfused through the round window and oval window  
442 with 4% paraformaldehyde in phosphate-buffered saline, then post-fixed in the same solution  
443 as described elsewhere<sup>39,41</sup>. Cochleae were dissected into half-turns for whole-mount  
444 processing. Immunostaining began with a blocking buffer (PBS with 5% normal goat or donkey  
445 serum and 0.2-1% Triton X-100) for 1 to 3 hrs at room temperature and followed by incubation  
446 with a combination of the following primary antibodies: 1) rabbit anti-CtBP2 (BD Biosciences) at  
447 1:100, 2) rabbit anti-myosin VIIa (Proteus Biosciences) at 1:200, 3) mouse anti-GluR2 (Millipore)  
448 at 1:2,000. Lengths of cochlear whole mounts were measured and converted to cochlear  
449 frequency. Confocal z-stacks from each ear were obtained in the inner hair cell area using a  
450 high-resolution glycerin-immersion objective (63x) and x3.18 digital zoom with a 0.25  $\mu$ m z-  
451 spacing on a Leica SP5 confocal microscope. For each stack, the z-planes imaged included all  
452 synaptic elements in the x-y field of view. Image stacks were imported to image-processing

453 software (Amira, Visage Imaging), where synaptic ribbons, glutamate receptor patches, and  
454 inner hair cells were counted.

455

#### 456 Statistical analyses

457 Statistical analyses were performed in Matlab (Mathworks). Descriptive statistics are  
458 provided as mean  $\pm$  SEM. Inferential statistics between control and noise-exposed samples  
459 were performed with two-tailed tests of unmatched samples (Between subjects ANOVA or  
460 unpaired t-tests). Statistical contrasts over the noise exposure period were performed with a  
461 repeated measures ANOVA. All post-hoc pairwise comparisons were corrected with Bonferroni-  
462 Holm to account for type-I error inflation due to multiple comparisons. All data can be made  
463 available upon reasonable request.

464

#### 465 **Acknowledgements**

466 We thank the UAB Vector Core, GENIE Program, the Janelia Farm Research Campus, and Penn  
467 Vector Core in the Gene Therapy Program of the University of Pennsylvania for providing the  
468 GCaMP6s and CAV2-Cre reagents for this project. We thank AE Hight for designing the head  
469 fixation hardware. We thank J. Dahmen, K. Kuchibhotla, and C. Harvey for guidance on the  
470 surgical preparation for chronic imaging. We thank S. Kujawa and A. Parthasarathy for their  
471 contributions to cochlear synapse quantification. This work was supported by NIDCD R01  
472 DC009836 (D.B.P), NIDCD F32 DC015376 (R.S.W.) and a Herchel Smith Graduate fellowship  
473 (M.A.)

474

475

476 **References**

- 477
- 478 1. Robinson, B. L. & McAlpine, D. Gain control mechanisms in the auditory pathway. *Curr.*  
479 *Opin. Neurobiol.* **19**, 402–407 (2009).
  - 480 2. Willmore, B. D. B., Cooke, J. E. & King, A. J. Hearing in noisy environments: noise  
481 invariance and contrast gain control. *J. Physiol.* **592**, 3371–3381 (2014).
  - 482 3. Salvi, R. *et al.* Inner hair cell loss disrupts hearing and cochlear function leading to  
483 sensory deprivation and enhanced central auditory gain. *Frontiers in Neuroscience* **10**,  
484 (2017).
  - 485 4. Guinan, J. J. Olivocochlear efferents: Their action, effects, measurement and uses, and  
486 the impact of the new conception of cochlear mechanical responses. *Hearing Research* in  
487 press (2017).
  - 488 5. Winer, J. A. Decoding the auditory corticofugal systems. *Hear. Res.* **212**, 1–8 (2006).
  - 489 6. Diamond, I. T., Jones, E. G. & Powell, T. P. S. The projection of the auditory cortex upon  
490 the diencephalon and brain stem in the cat. *Brain Res.* **15**, 305–340 (1969).
  - 491 7. Terreros, G. & Delano, P. H. Corticofugal modulation of peripheral auditory responses.  
492 *Front. Syst. Neurosci.* **9**, 1–8 (2015).
  - 493 8. Lesicko, A. M. H. & Llano, D. A. Impact of peripheral hearing loss on top-down auditory  
494 processing. *Hear. Res.* **343**, 4–13 (2017).
  - 495 9. Robinson, B. L., Harper, N. S. & McAlpine, D. Meta-adaptation in the auditory midbrain  
496 under cortical influence. *Nat. Commun.* **7**, 13442 (2016).
  - 497 10. Malmierca, M. S., Anderson, L. A. & Antunes, F. M. The cortical modulation of stimulus-  
498 specific adaptation in the auditory midbrain and thalamus : a potential neuronal  
499 correlate for predictive coding. *Front. Syst. Neurosci.* **9**, 1–14 (2015).
  - 500 11. Winkowski, D. E. & Knudsen, E. I. Top-down gain control of the auditory space map by  
501 gaze control circuitry in the barn owl. *Nature* **439**, 336–339 (2006).
  - 502 12. Suga, N. & Ma, X. Multiparametric corticofugal modulation and plasticity in the auditory  
503 system. *Nat. Rev. Neurosci.* **4**, 783–794 (2003).
  - 504 13. Nakamoto, K. T., Jones, S. J. & Palmer, A. R. Descending projections From auditory cortex  
505 modulate sensitivity in the midbrain to cues for spatial position. *J. Neurophysiol.* **99**,  
506 2347–2356 (2008).
  - 507 14. Ryugo, D. K. & Weinberger, N. M. Corticofugal modulation of the medial geniculate body.  
508 *Exp. Neurol.* **51**, 377–391 (1976).
  - 509 15. Slater, B. J., Willis, A. M. & Llano, D. A. Evidence for layer-specific differences in auditory  
510 corticocollicular neurons. *Neuroscience* **229**, 144–154 (2013).
  - 511 16. Llano, D. A. & Sherman, S. M. Differences in intrinsic properties and local network  
512 connectivity of identified layer 5 and layer 6 adult mouse auditory corticothalamic  
513 neurons support a dual corticothalamic projection hypothesis. *Cereb. Cortex* **19**, 2810–  
514 2826 (2009).
  - 515 17. Joshi, A. *et al.* Cell-specific activity-dependent fractionation of layer 2/3-5B excitatory  
516 signaling in mouse auditory cortex. *J. Neurosci.* **35**, 3112–3123 (2015).
  - 517 18. Rock, C., Zurita, H., Wilson, C. & Apicella, A. J. An inhibitory corticostriatal pathway. *eLife*  
518 **5**, 1–17 (2016).
  - 519 19. Harris, K. D. & Shepherd, G. M. G. The neocortical circuit: themes and variations. *Nat.*

- 520 *Neurosci.* **18**, 170–181 (2015).
- 521 20. Han, Y. *et al.* The logic of single-cell projections from visual cortex. *Nature* **556**, 51–56  
522 (2018).
- 523 21. Bajo, V. M., Nodal, F. R., Moore, D. R. & King, A. J. The descending corticocollicular  
524 pathway mediates learning-induced auditory plasticity. *Nat. Neurosci.* **13**, 253–260  
525 (2010).
- 526 22. Homma, X. N. Y. *et al.* A role for auditory corticothalamic feedback in the perception of  
527 complex sounds. *J. Neurosci.* **37**, 6149–6161 (2017).
- 528 23. Torii, M., Hackett, T. A. A., Rakic, P., Levitt, P. & Polley, D. B. B. EphA signaling impacts  
529 development of topographic connectivity in auditory corticofugal systems. *Cereb. Cortex*  
530 **23**, 775–785 (2013).
- 531 24. Guo, W. *et al.* A corticothalamic circuit for dynamic switching between feature detection  
532 and discrimination. *Neuron* **95**, 180–194 (2017).
- 533 25. Zingg, B. *et al.* AAV-mediated anterograde transsynaptic tagging: mapping  
534 corticocollicular input-defined neural pathways for defense behaviors. *Neuron* **93**, 33–47  
535 (2017).
- 536 26. Xiong, X. R. *et al.* Auditory cortex controls sound-driven innate defense behaviour  
537 through corticofugal projections to inferior colliculus. *Nat. Commun.* **6**, 7224 (2015).
- 538 27. Znamenskiy, P. & Zador, A. M. Corticostriatal neurons in auditory cortex drive decisions  
539 during auditory discrimination. *Nature* **497**, 482–485 (2013).
- 540 28. Rothmel, M. & Wachowiak, M. Functional imaging of cortical feedback projections to  
541 the olfactory bulb. *Front. Neural Circuits* **9**, 73 (2014).
- 542 29. Barnstedt, O., Keating, P., Weissenberger, Y., King, A. J. & Dahmen, J. C. Functional  
543 microarchitecture of the mouse dorsal inferior colliculus revealed through In vivo two-  
544 photon calcium imaging. *J. Neurosci.* **35**, 10927–39 (2015).
- 545 30. Harris, K. D. & Mrsic-flogel, T. D. Cortical connectivity and sensory coding. *Nature* **503**,  
546 51–58 (2013).
- 547 31. King, V. M. B. and A. J. Cortical modulation of auditory processing in the midbrain. *Front.*  
548 *Neural Circuits* **6**, 1–12 (2013).
- 549 32. Moriizumi, T. & Hattori, T. Pyramidal cells in rat temporoauditory cortex project to both  
550 striatum and inferior colliculus. *Brain Res. Bull.* **27**, 141–144 (1991).
- 551 33. Doucet, J. R., Molavi, D. L. & Ryugo, D. K. The source of corticocollicular and corticobulbar  
552 projections in area Te1 of the rat. *Exp. brain Res.* **153**, 461–466 (2003).
- 553 34. Soudais, C., Laplace-Builhe, C., Kissa, K. & Kremer, E. J. Preferential transduction of  
554 neurons by canine adenovirus vectors and their efficient retrograde transport in vivo.  
555 *Fed. Am. Soc. Exp. Biol.* **15**, 2283–2285 (2001).
- 556 35. Schneider, D. M., Nelson, A. & Mooney, R. A synaptic and circuit basis for corollary  
557 discharge in the auditory cortex. *Nature* **513**, 189–194 (2014).
- 558 36. Liu, B., Huberman, A. D. & Scanziani, M. Cortico-fugal output from visual cortex promotes  
559 plasticity of innate motor behaviour. *Nature* **538**, 383–387 (2016).
- 560 37. Games, K. D. & Winer, J. A. Layer V in rat auditory cortex: Projections to the inferior  
561 colliculus and contralateral cortex. *Hear. Res.* **34**, 1–26 (1988).
- 562 38. Goldey, G. J. *et al.* Removable cranial windows for long-term imaging in awake mice. *Nat.*  
563 *Protoc.* **9**, 2515–2538 (2014).



- 564 39. Kujawa, S. G. & Liberman, M. C. Adding insult to injury: cochlear nerve degeneration  
565 after ‘temporary’ noise-induced hearing loss. *J. Neurosci.* **29**, 14077–14085 (2009).
- 566 40. Liberman, M. C. & Kujawa, S. G. Cochlear synaptopathy in acquired sensorineural hearing  
567 loss: Manifestations and mechanisms. *Hear. Res.* **349**, 138–147 (2017).
- 568 41. Chambers, A. R. *et al.* Central gain restores auditory processing following near-complete  
569 cochlear denervation. *Neuron* **89**, 1–13 (2016).
- 570 42. Liberman, L. D., Suzuki, J. & Liberman, M. C. Dynamics of cochlear synaptopathy after  
571 acoustic overexposure. *J. Assoc. Res. Otolaryngol.* **16**, 205–219 (2015).
- 572 43. Yang, S., Su, W. & Bao, S. Long-term, but not transient, threshold shifts alter the  
573 morphology and increase the excitability of cortical pyramidal neurons. *J. Neurophysiol.*  
574 **108**, 1567–1574 (2012).
- 575 44. Li, S., Kalappa, B. I. & Tzounopoulos, T. Noise-induced plasticity of KCNQ2/3 and HCN  
576 channels underlies vulnerability and resilience to tinnitus. *eLife* **4**, 1–23 (2015).
- 577 45. Sarro, E. C., Kotak, V. C., Sanes, D. H. & Aoki, C. Hearing loss alters the subcellular  
578 distribution of presynaptic GAD and postsynaptic GABAA receptors in the auditory  
579 cortex. *Cereb. Cortex* **18**, 2855–2867 (2008).
- 580 46. Kotak, V. C. *et al.* Hearing loss raises excitability in the auditory cortex. *J. Neurosci.* **25**,  
581 3908–18 (2005).
- 582 47. Takesian, A. E., Kotak, V. C. & Sanes, D. H. Presynaptic GABAB receptors regulate  
583 experience-dependent development of inhibitory short-term plasticity. *J. Neurosci.* **30**,  
584 2716–2727 (2010).
- 585 48. Yang, S., Weiner, B. D., Zhang, L. S., Cho, S.-J. S.-J. & Bao, S. Homeostatic plasticity drives  
586 tinnitus perception in an animal model. *Proc. Natl. Acad. Sci.* **108**, 14974–14979 (2011).
- 587 49. Sturm, J. J., Zhang-Hooks, Y.-X., Roos, H., Nguyen, T. & Kandler, K. Noise trauma induced  
588 behavioral gap detection deficits correlate with reorganization of excitatory and  
589 inhibitory local circuits in the inferior colliculus and are prevented by acoustic  
590 enrichment. *J. Neurosci.* **37**, 602–17 (2017).
- 591 50. Sametsky, E. A., Turner, J. G., Larsen, D., Ling, L. & Caspary, D. M. Enhanced GABAA-  
592 mediated tonic inhibition in auditory thalamus of rats with behavioral evidence of  
593 tinnitus. *J. Neurosci.* **35**, 9369–9380 (2015).
- 594 51. Scholl, B. & Wehr, M. Disruption of balanced cortical excitation and inhibition by acoustic  
595 trauma. *J. Neurophysiol.* **100**, 646–656 (2008).
- 596 52. Takesian, A. E., Kotak, V. C., Sharma, N. & Sanes, D. H. Hearing loss differentially affects  
597 thalamic drive to two cortical interneuron subtypes. *J. Neurophysiol.* **110**, 999–1008  
598 (2013).
- 599 53. Auerbach, B. D., Rodrigues, P. V & Salvi, R. J. Central gain control in tinnitus and  
600 hyperacusis. *Front. Neurol.* **5**, (2014).
- 601 54. Lobarinas, E., Salvi, R. & Ding, D. Insensitivity of the audiogram to carboplatin induced  
602 inner hair cell loss in chinchillas. *Hear. Res.* 1–8 (2013).
- 603 55. Zeng, F. G. Perceptual consequences of disrupted auditory nerve activity. *J. Neurophysiol.*  
604 **93**, 3050–3063 (2005).
- 605 56. Schuknecht, H. F. & Woellner, R. C. Hearing losses following partial section of the  
606 cochlear nerve. *Laryngoscope* **63**, 441–465 (1953).
- 607 57. Turrigiano, G. Homeostatic synaptic plasticity: local and global mechanisms for stabilizing



- 608 neuronal function. *Cold Spring Harb. Perspect. Biol.* **4**, a005736–a005736 (2012).
- 609 58. Resnik, J. & Polley, D. B. Fast-spiking GABA circuit dynamics in the auditory cortex predict  
610 recovery of sensory processing following peripheral nerve damage. *eLife* **6**, (2017).
- 611 59. Li, L. *et al.* Rapid homeostasis by disinhibition during whisker map plasticity. *Proc. Natl.*  
612 *Acad. Sci. U. S. A.* **111**, 1616–21 (2014).
- 613 60. Barnes, S. J. *et al.* Subnetwork-specific homeostatic plasticity in mouse visual cortex in  
614 vivo. *Neuron* **86**, 1290–1303 (2015).
- 615 61. Greenhill, S. D., Ranson, A. & Fox, K. Hebbian and homeostatic plasticity mechanisms in  
616 regular spiking and intrinsic bursting cells of cortical layer 5. *Neuron* **88**, 539–552 (2015).
- 617 62. Keck, T. *et al.* Integrating Hebbian and homeostatic plasticity: the current state of the  
618 field and future research directions. *Philos. Trans. R. Soc. B Biol. Sci.* **372**, 20160158  
619 (2017).
- 620 63. Sun, Y. J., Kim, Y. J., Ibrahim, L. A., Tao, H. W. & Zhang, L. I. Synaptic mechanisms  
621 underlying functional dichotomy between intrinsic-bursting and regular-spiking neurons  
622 in auditory cortical layer 5. *J. Neurosci.* **33**, 5326–5339 (2013).
- 623 64. Sedley, W. *et al.* Intracranial mapping of a cortical tinnitus system using residual  
624 inhibition. *Curr. Biol.* **25**, 1208–1214 (2015).
- 625 65. Kraus, K. S. & Canlon, B. Neuronal connectivity and interactions between the auditory  
626 and limbic systems. Effects of noise and tinnitus. *Hear. Res.* **288**, 34–46 (2012).
- 627 66. Bhatt, J. M., Bhattacharyya, N. & Lin, H. W. Relationships between tinnitus and the  
628 prevalence of anxiety and depression. *Laryngoscope* **127**, 466–469 (2017).
- 629 67. Chen, Y. C. *et al.* Tinnitus and hyperacusis involve hyperactivity and enhanced  
630 connectivity in auditory-limbic-arousal-cerebellar network. *eLife* **4**, 1–19 (2015).
- 631 68. Leaver, A. M. *et al.* Intrinsic network activity in tinnitus investigated using functional MRI.  
632 *Hum. Brain Mapp.* **37**, 2717–2735 (2016).

633  
634  
635  
636  
637  
638  
639  
640  
641  
642  
643  
644  
645  
646  
647  
648  
649  
650  
651

652

Asokan et al., R1 Figure 1

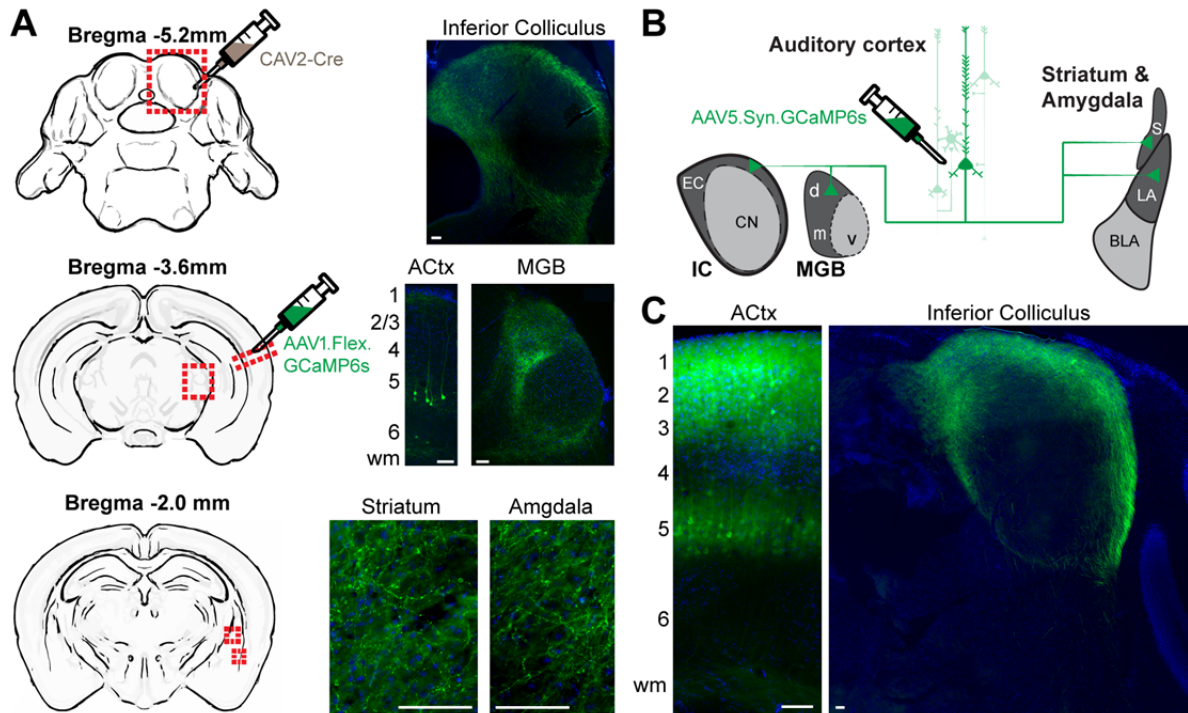

653

654

655 **Figure 1. Auditory corticofugal neurons that innervate the inferior colliculus have other**  
 656 **widespread targets throughout the forebrain. (A)** A canine adenovirus vector with efficient  
 657 retrograde transport (CAV2) was injected into the IC to express cre-recombinase in neurons  
 658 that project into the injection zone. A cre-dependent AAV was then injected into the ipsilateral  
 659 ACTx to express a fluorescent marker throughout the entire axon field of CCol neurons.  
 660 Photomicrographs show the expected labeling of layer 5 ACTx neurons and their IC axon  
 661 terminals, with additional strong axon labeling in the dorsal nucleus of the medial geniculate  
 662 body, lateral amygdala, and posterior regions of the dorsal striatum. wm = white matter. **(B)**  
 663 Schematic of virus strategy used for *in vivo* Ca<sup>2+</sup> imaging in corticofugal axons. EC and CN =  
 664 external cortex and central nucleus of the IC, respectively. MGB subdivisions d, v and m =  
 665 dorsal, ventral and medial, respectively. BLA = basolateral amygdala. S = striatum. **(C)** Strong  
 666 labeling of L5 pyramidal neuron cell bodies, apical dendrites and CCol axon terminals are  
 667 observed approximately 5 weeks after injection of the GCaMP6s virus in ACTx. All scale bars =  
 668 0.1 mm.

669

670

671

672

673

674

675

676

Asokan et al., R1 Figure 2

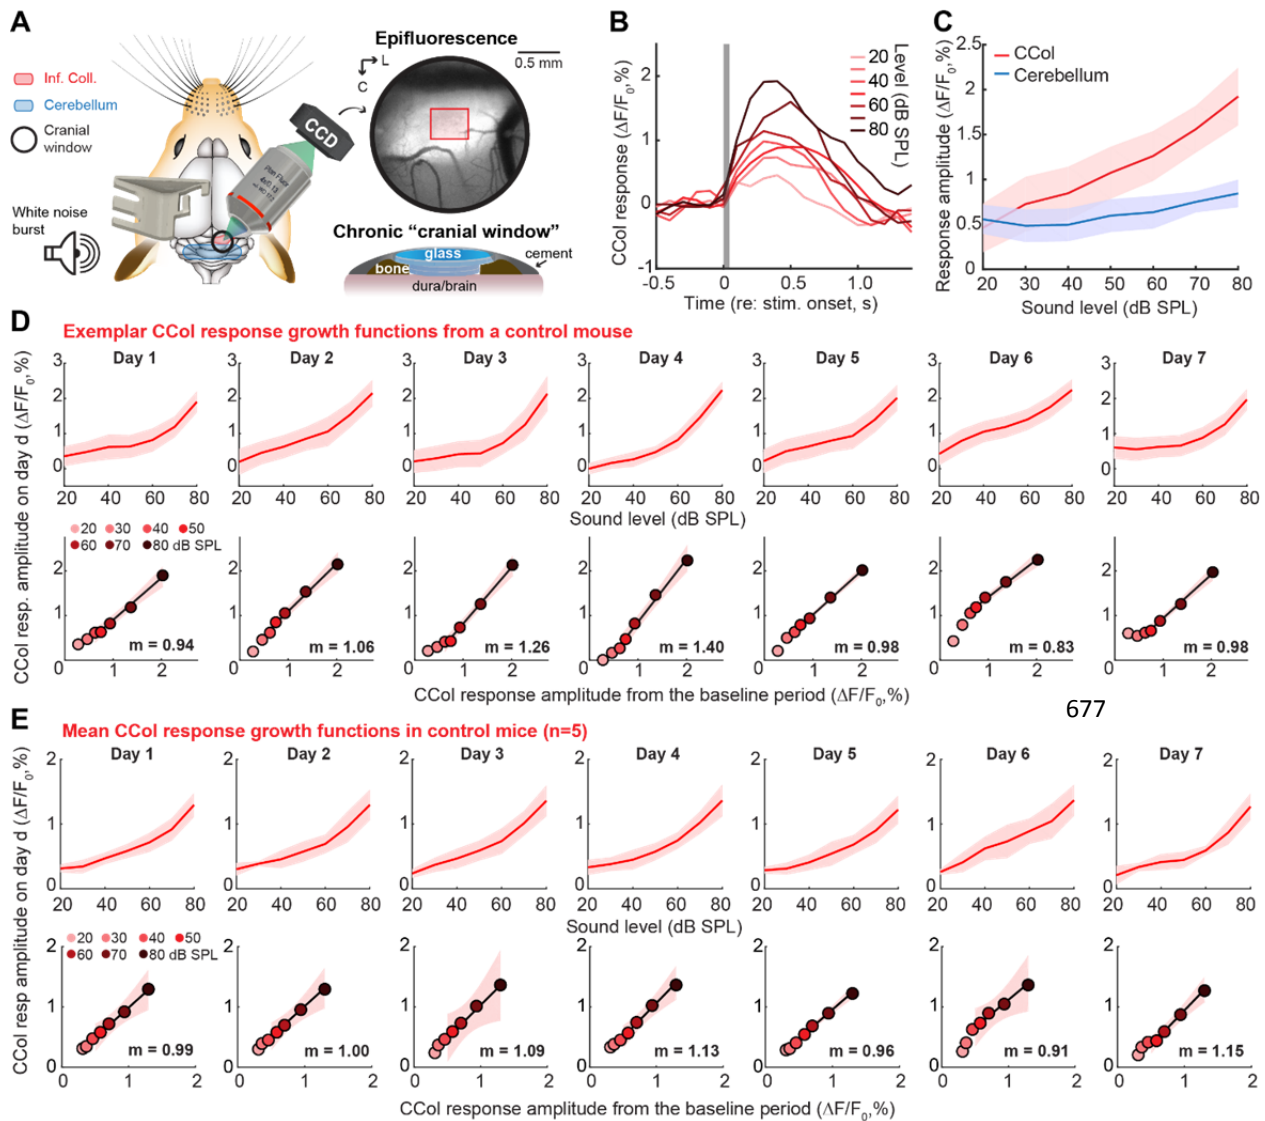

678

679 **Figure 2. Sound-evoked corticocollicular axon response increases monotonically with sound**  
 680 **level and remains stable over one week of imaging. (A)** A chronic preparation for  
 681 epifluorescence imaging of GCaMP6s in CCol axons via a cranial window in awake, head-fixed  
 682 mice. Red rectangle denotes region of interest for CCol imaging. L = lateral. C = caudal. **(B)** Time  
 683 course of mean fractional change in the CCol response amplitude evoked by a 50 ms white  
 684 noise burst from a single imaging session. Gray box denotes stimulus timing and duration. **(C)**  
 685 The monotonic growth of CCol peak response amplitude falls off steeply when the region of  
 686 interest is shifted away from the IC. Data represent mean  $\pm$  SEM. **(D)** *Top*: CCol response  
 687 growth functions from a single mouse across seven daily imaging sessions. Data represent  
 688 mean  $\pm$  SEM. *Bottom*: Scatterplots depict the mean CCol response amplitude at each sound  
 689 level measured from the first two imaging sessions (x-axis, defined as baseline) against the CCol  
 690 response amplitude measured on the day specified (y-axis). The slope ( $m$ ) of the linear fit  
 691 provides an estimate of daily changes in response gain, where  $m = 1$  indicates a matched  
 692 response growth relative to baseline,  $m < 1$  = a divisive flattening of the growth function, and  $m$   
 693  $> 1$  = multiplicative enhancement relative to baseline. Shading represents the 95% confidence  
 694 interval of the fit. **(E)** As per D, averaged across all control mice ( $n=5$ ).

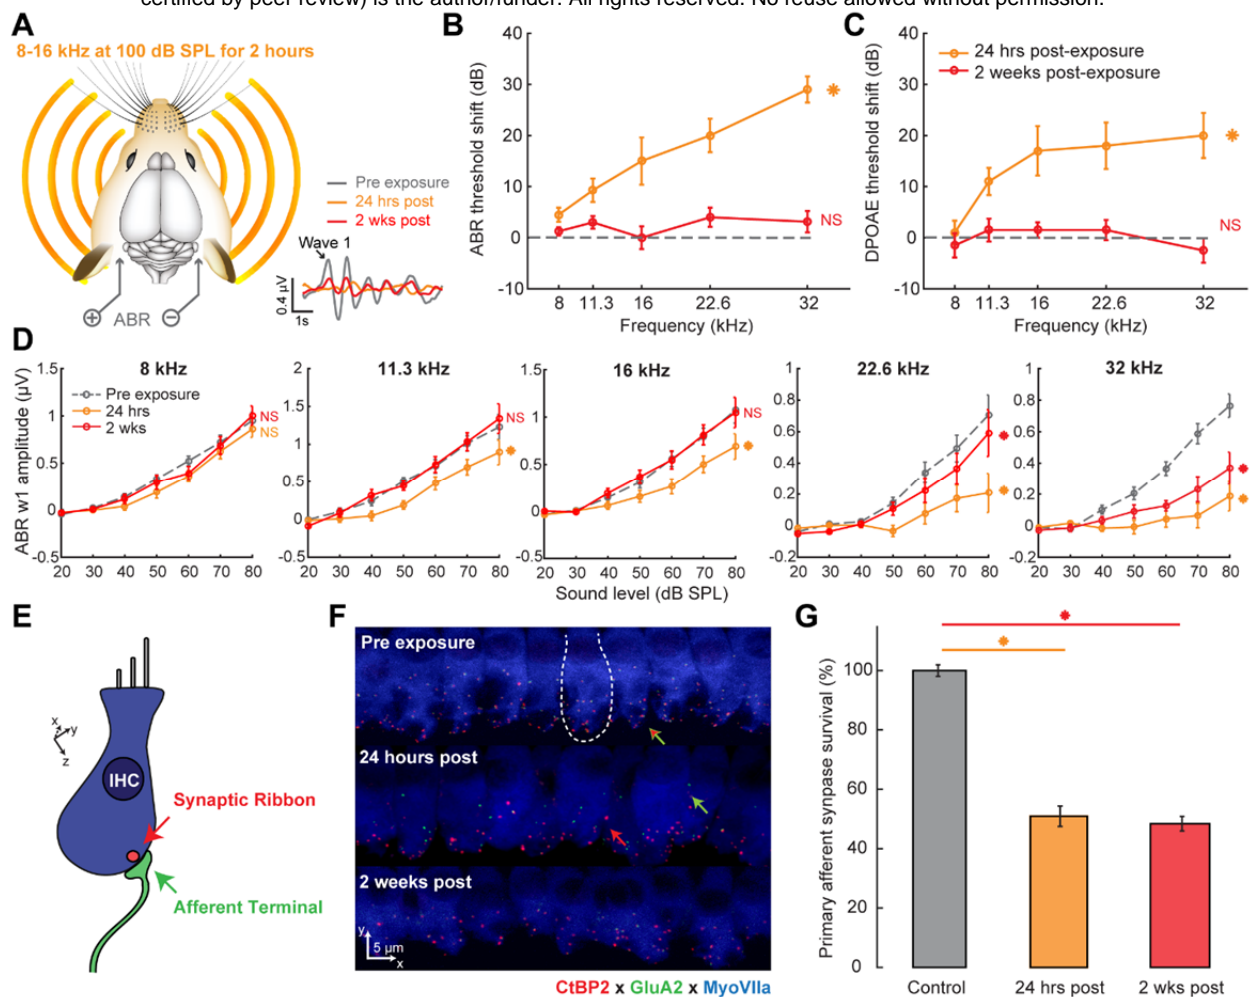

695 **Figure 3. Moderate intensity noise exposure induces a temporary shift in cochlear and**  
 696 **brainstem response thresholds but a permanent loss of auditory nerve afferent fibers. (A)**  
 697 Schematic of noise exposure and auditory brainstem response (ABR) measurement protocols.  
 698 Example ABR waveforms evoked with a 32 kHz tone bursts before, 24 hours after and 2 weeks  
 699 after noise exposure. **(B-C)** Elevations in ABR and distortion product otoacoustic emission  
 700 (DPOAE) thresholds (**B** and **C**, respectively) are observed 1 day following noise exposure  
 701 (orange) but have returned to baseline 2 weeks following noise exposure (red). **(D)** ABR wave 1  
 702 (w1) growth functions. NS = no significant difference with pre-exposure. Asterisk = significant  
 703 main effect for ABR amplitude between pre-exposure and post-exposure. Data represent mean  
 704  $\pm$  SEM,  $n = 10$  mice in pre-exposure and 24 hrs post conditions,  $n = 8$  mice for 2 wks post. **(E-F)**  
 705 Schematic **(E)** and actual **(F)** visualizations of cochlear nerve afferent synapses on inner hair  
 706 cells. Red and green arrows depict orphaned presynaptic ribbons and postsynaptic GluA2  
 707 receptor patches, respectively. Combined red and green arrow identifies primary afferent  
 708 cochlear synapses as appositions of the CtBP2 and GluA2 pre- and post-synaptic markers,  
 709 respectively. Dashed white line depicts the boundary of a single inner hair cell. **(G)**  
 710 Quantification of cochlear afferent synapses in control mice, 24 hours and 2 weeks following  
 711 noise exposure 22.6 kHz region of the cochlear frequency map. Synaptic counts are expressed  
 712 as percent survival by comparison to normative standards from age- and strain-matched  
 713 mice<sup>41,42</sup>. Asterisk = significant difference with an unpaired t-test after correcting for multiple  
 714 comparisons. Synaptic counts were made from 20.77 - 21.73 individual inner hair cells at a fixed  
 715 position in the cochlear frequency map between the 20 - 30 kHz region in each ear, 3 ears per  
 716 group).



Asokan et al., R1 Figure 4

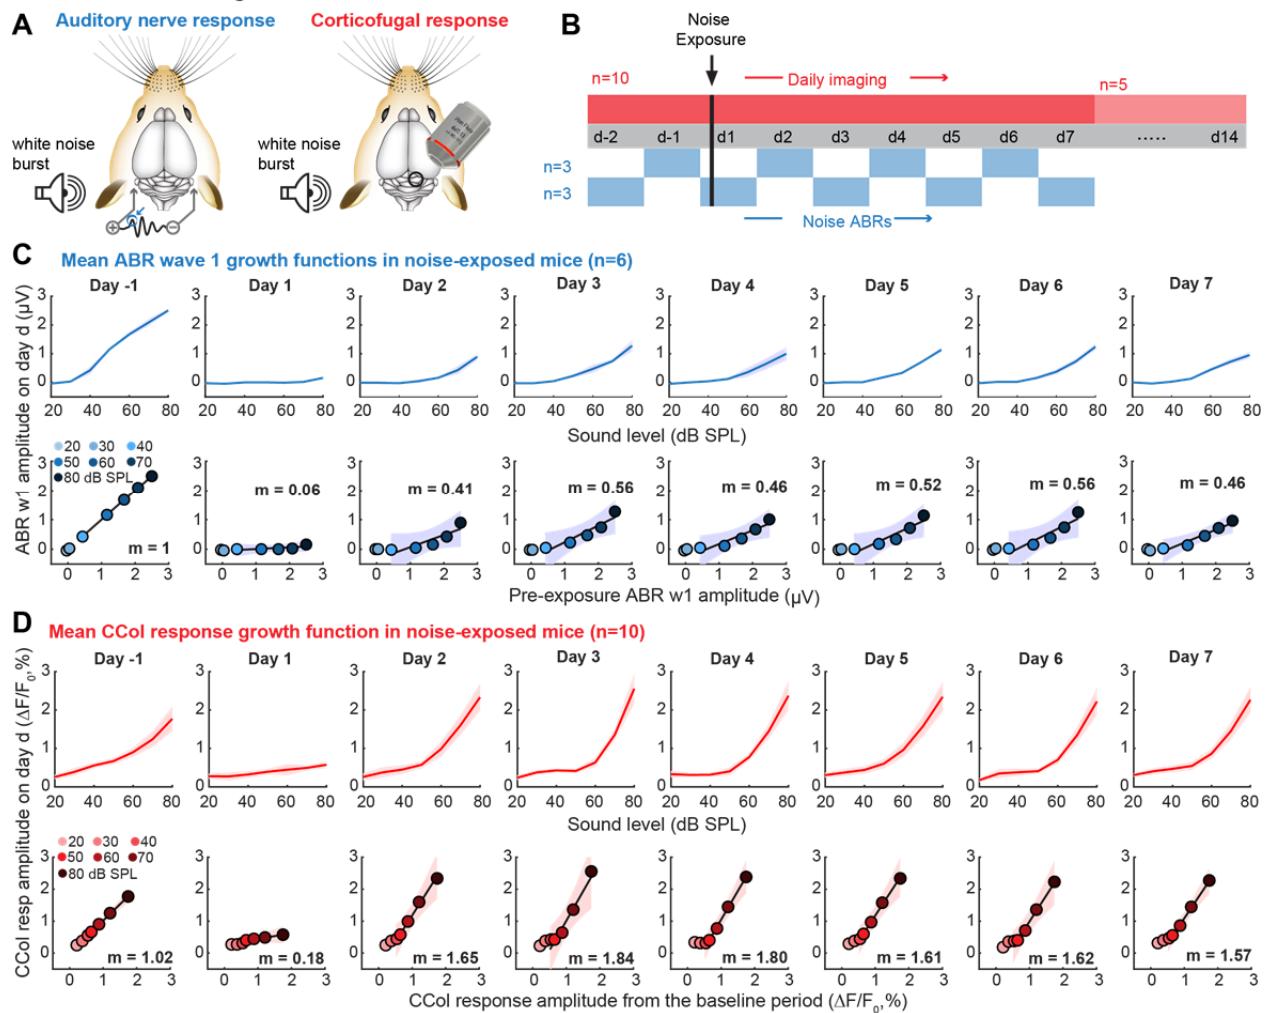

717

718

719 **Figure 4. Opposing changes in auditory nerve and corticocollicular response growth functions**

720 **following cochlear synaptopathy. (A)** Auditory nerve growth functions were measured under

721 anesthesia every other day according to the change in ABR wave 1 (blue circle) amplitude to

722 white noise bursts of varying level (n=6). CCol response growth functions were measured daily

723 in a separate cohort of awake mice (n=10) also using white noise bursts, per previous figures.

724 **(B)** ABR wave 1 and CCol responses were both measured for two days (d) prior to moderate

725 noise exposure and for seven days following noise exposure. In a subset of noise-exposed mice

726 (n=5), CCol imaging was extended for an additional week after noise exposure. **(C-D)** As per Fig.

727 2E, ABR wave 1 (C) and CCol response (D) growth functions (top rows) and scatterplots of linear

728 fits for baseline vs post-exposure growth functions (bottom rows) are provided for all mice.

729 Data represent mean  $\pm$  SEM. Linear fits of the five highest sound levels are illustrated by the

730 solid black line with corresponding slope (m) and 95% confidence interval (blue and red

731 shading).

732

Asokan et al., R1 Figure 5

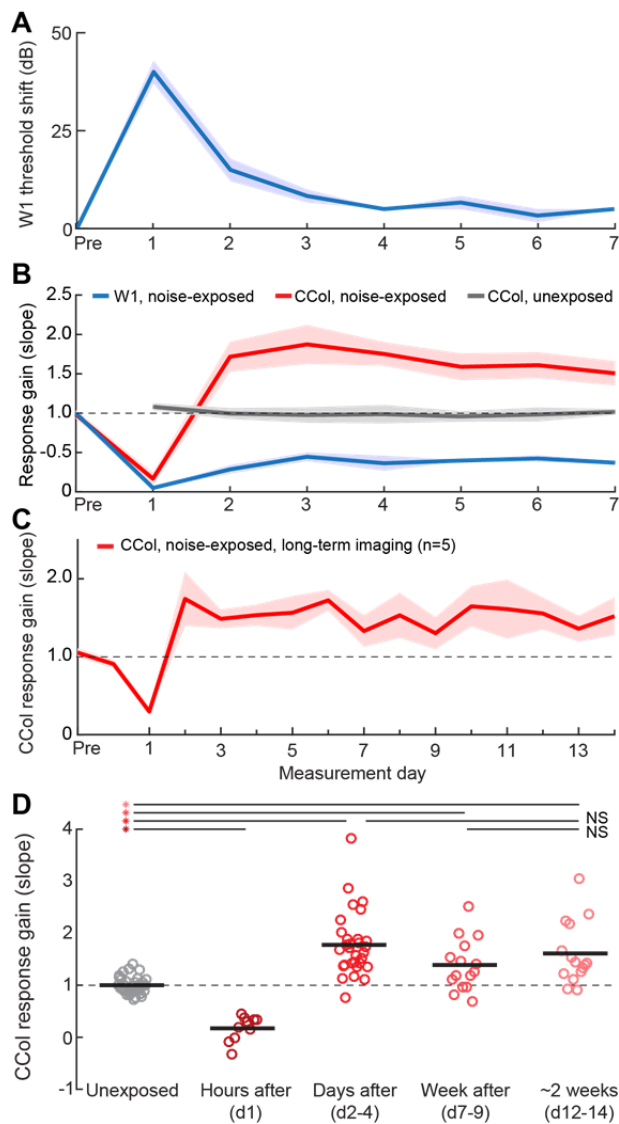

733

734

735 **Figure 5. ABR threshold recovery belies ongoing dynamics in auditory nerve and**  
736 **corticocollicular response gain. (A)** Moderate noise exposure induces a temporary shift in the  
737 ABR wave 1 threshold to white noise bursts that resolved after two days. **(B)** Daily changes in  
738 response gain for CCol measurements in unexposed control (gray, n = 5) and noise-exposed  
739 (red, n = 10) mice are contrasted with daily changes in the response gain of ABR wave 1 in noise-  
740 exposed mice (blue, n = 6). In all cases, gain is calculated as the slope of the fit line applied to  
741 sound level growth functions measured during baseline and subsequent days. **(C)** Daily changes  
742 in CCol response gain over an extended 2-week imaging period in a subset of noise-exposed  
743 mice (n=5). For A-C, Data represent mean  $\pm$  SEM. **(D)** Gain estimates from individual imaging  
744 sessions in unexposed control mice (gray) are contrasted with gain estimates measured during  
745 the first imaging session following noise exposure (hours after), or during 3-day epochs  
746 occurring on d2-4, d7-9 or d12-14. Thick horizontal bars represent sample means. Individual  
747 circles represent all individual data points. Asterisks and NS denote statistically significant  
748 differences or lack thereof, respectively, for pairwise comparisons indicated by thin horizontal  
749 lines after correcting for multiple comparisons.
